## Research Article

# Clinicopathological and prognostic significance of LINC00673 in human malignancy: a review and meta-analysis

Yurong Zhu<sup>1,2,\*</sup>, Zhifa Zhang<sup>2,\*</sup>, Hui Peng<sup>2,3</sup>, Weiping Li<sup>2</sup>, Shaowei Hu<sup>2</sup>, Min Zhao<sup>2</sup> and  Weifeng Lin<sup>4,5</sup>

<sup>1</sup>Department of Pathology, Dongguan People's Hospital (Affiliated Dongguan People's Hospital, Southern Medical University), Dongguan, China; <sup>2</sup>Department of Pathology, Guangdong Provincial Hospital of Chinese Medicine, The Second Clinical Medical College, Guangzhou University of Chinese Medicine, Guangzhou, China; <sup>3</sup>Department of Pathology, Guangdong Provincial Hospital of Chinese Medicine-Zhuhai Hospital, Zhuhai, China; <sup>4</sup>Department of Neurology, The First Affiliated Hospital of Jinan University, Guangzhou, China; <sup>5</sup>Department of Neurology, Dongguan People's Hospital (Affiliated Dongguan People's Hospital, Southern Medical University), Dongguan, China

**Correspondence:** Weifeng Lin (lwfsjd@126.com)

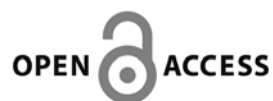

**Background:** We conducted this research to investigate the relationship between long intergenic non-protein coding RNA 673 (linc00673) expression and prognosis and clinicopathological parameters in human malignancies.

**Methods:** The PubMed, Embase, WOS, and CNKI databases were used to collect eligible research data before 4 January 2021. Meta-analysis was performed using Stata 12.0 software. Pooled odds ratios (ORs) or hazard ratios (HRs) and their 95% confidence interval (CIs) were calculated to evaluate the association of linc00673 expression with survival outcomes and clinical parameters.

**Results:** We finally included 17 articles and a total of 1539 cases for the meta-analysis. The results indicated that linc00673 was significantly correlated with T stage ( $P=0.006$ ), tumor stage ( $P<0.001$ ), lymph node metastasis ( $P<0.001$ ), and distant metastasis ( $P<0.001$ ). In addition, the results suggested that elevated linc00673 expression predicted a poor overall survival (OS) time ( $P=0.013$ ) and acted as an independent prognostic factor ( $P<0.001$ ) for OS in patients with malignancy. Although potential evidence of publication bias was found in the studies on OS in relation to tumor stage in the multivariate analysis, the trim-and-fill analysis confirmed that the results remained stable.

**Conclusions:** Overexpression of linc00673 was significantly correlated with shorter OS time in patients with malignant tumors. Moreover, the increased expression level of linc00673 was significantly correlated with T stage, tumor stage, lymph node metastasis, and distant metastasis. The results presented in this article revealed that linc00673 might be involved in the progression and invasion of malignancy and serve as a novel prognostic biomarker and potential therapeutic target for malignancy.

\*These authors contributed equally to this work.

Received: 18 May 2021

Revised: 17 June 2021

Accepted: 21 June 2021

Accepted Manuscript online:  
07 July 2021

Version of Record published:  
28 July 2021

## Introduction

Malignant neoplasms are a complex, multifactorial and worldwide public health problem, with increasing incidence and mortality in this century [1]. Human cancers arise from the stepwise accumulation of genetic and epigenetic alterations [2]. In previous studies, intense efforts have been devoted to understanding proteins and their functions, and RNA is understood to be a mediator of the translation of the genetic code from DNA to protein. In recent years, with the rapid advance of high-throughput sequencing technologies, multiple studies have revealed that although over 75% of the human genome is transcribed [3], only approximately 2% of it encodes proteins [4]. Most RNA transcripts are not translated into proteins and are referred to as non-coding RNAs (ncRNAs).

Depending on the number of nucleotides, ncRNAs are classified as small ncRNAs (sncRNAs) and long ncRNAs (lncRNAs). LncRNAs are a large group of transcripts that are >200 nucleotides in length and are categorized as intronic lncRNAs, intergenic lncRNAs (lincRNAs), enhancer lncRNAs (elncRNAs), bidirectional lncRNAs, overlapping lncRNAs, and antisense lncRNAs on the basis of their genomic localization [5]. LincRNAs are likely the most important group of lncRNAs and originate from the region between two protein-coding genes and were previously regarded as ‘junk’ DNA [6]. Of note, however, increasing evidence suggests that lncRNAs may play important roles in facilitating and maintaining cancer origination and progression [5,7,8] by interacting with chromosomes, RNA, and proteins [9].

Among these tumor-related lincRNAs, a newly discovered lincRNA referred to as ‘long intergenic non-protein coding RNA 673’ (linc00673), also known as ‘SRA-like non-coding RNA’ (SLNCR) or ERLLR01, has drawn increasing attention. Linc00673 is located on chromosome 17 and has a total of five transcript variants (V1, V2, V3, V4, and V5), as shown in the NCBI database. Some studies have shown that linc00673 expression is down-regulated in pancreatic cancer, and as a suppressor, linc00673 overexpression may inhibit the proliferation and migration of cancer cells [10,11]. However, multiple studies have revealed that the expression of linc00673 is markedly elevated in other human cancer tissues and cells [12,13]. It has been described that linc00673 promotes tumor progression via multiple pathways, including anti-apoptosis, proliferation, metastasis and invasiveness pathways, and promotes cancer stem-like cell properties [14,15]. Linc00673 may indicate poor prognosis of malignancies [16]. In brief, there is a high level of discrepancy in the literature regarding the role of linc00673 expression. Therefore, a systematic review and quantitative meta-analysis that aimed to investigate the clinicopathological and prognostic value of linc00673 as a potential biomarker in human malignant tumors was conducted.

## Materials and methods

### Retrieval strategy and registration

An extensive electronic search of the literature was conducted through databases including PubMed, Web of Science, Embase, and CNKI for eligible studies published until 4 January 2021, with the following terms: ‘(neoplasms OR neoplasia OR carcinoma OR tumour OR cancer OR malignancy OR epithelioma OR sarcoma OR lymphoma OR leukaemia) and (LINC00673 OR long intergenic nonprotein coding RNA 673 OR LncRNA00673 OR SLNCR1 OR SLNCR OR ERLLR01)’. The search language, publication year, and race were not restricted. To find additional studies, we manually screened the reference lists of review articles. A flowchart of the study screening process is shown in Figure 1. This project was registered in PROSPERO (ID: CRD42020149189).

### Quality assessment

Methodological quality evaluation of the selected studies was performed independently by two investigators. Any discrepancies found in the included studies were resolved through discussion or consultation with a third investigator until a consensus was reached. The Newcastle–Ottawa Quality Assessment Scale (NOS) was used to assess the quality of each cohort study ([http://www.ohri.ca/programs/clinical\\_epidemiology/oxford.asp](http://www.ohri.ca/programs/clinical_epidemiology/oxford.asp)), while the Agency for Healthcare Research and Quality (AHRQ) was used to assess the quality of cross-sectional observational studies [17] (Table 1). NOS scores were subdivided into those indicating high quality ( $\geq 6$ ) and low quality ( $< 6$ ) [18], and AHRQ scores were subdivided into those indicating high quality (8–11), moderate quality (4–7), and low quality (0–3).

### Inclusion and exclusion criteria

The inclusion criteria were as follows: (i) only patients with malignant tumors were included in the present study; (ii) linc00673 RNA expression was assessed in tissues, not plasma or other fluids, by valid techniques; (iii) clinicopathologic parameters such as lymph node metastasis, tumor differentiation, tumor stage and distant metastasis were described, and (iv) the association between linc00673 and the overall survival (OS) time was evaluated, for which the hazard ratios (HRs) and 95% confidence interval (CIs) or Kaplan–Meier curves were calculated.

The exclusion criteria were as follows: (i) reviews, case reports, conference abstracts, patents, corrections, and commentaries; (ii) reduplicative publications; (iii) studies focused on other lncRNAs or linc00673 polymorphisms; (iv) studies that only concentrated on the function of linc00673 and possible molecular mechanisms, such as experiments on cells and animals, and (v) studies for which data were unavailable.

Data were extracted independently by two researchers and were thoroughly reviewed and discussed. Specifically, the following information was extracted from each study: the surname or full name of first author, the year of publication, the name of the journal or other publication, the language of the publication, the country the publication originated from, the patient tumor type evaluated, the detection method used, the sample size, the cut-off value of

**Table 1 Basic characteristics and quality assessment of the included studies**

| Study | Year | Tumor type | Detection method | Cut-off            | Sample size | <i>n</i> (high/low) <sup>1</sup> | Expression in tumor ( $\bar{x} \pm$ SD/rate, <i>P</i> ) <sup>2</sup> | AHRQ NOS score | NOS score | HR statistic                     | Clinicopathological parameters included in the meta-analysis |
|-------|------|------------|------------------|--------------------|-------------|----------------------------------|----------------------------------------------------------------------|----------------|-----------|----------------------------------|--------------------------------------------------------------|
| Feng  | 2018 | CRC        | qRT-PCR          | Fold change > 4.5  | 71          | 36/35                            | Up (71.8%, NA)                                                       | NA             | 8         | Data in paper                    | Age, gender, tumor size, TS (TNM), LNM, DM, TD               |
| Yang  | 2017 | PDAC       | qRT-PCR          | Mean value         | 50          | 25/25                            | Down (NA, <i>P</i> =0.003)                                           | NA             | 7         | Survival curve                   | Age, gender, tumor size, T stage, LNM, TD                    |
| Tan   | 2017 | NSCLC      | qRT-PCR          | Median level       | 76          | 38/38                            | Up (NA, <i>P</i> <0.01)                                              | 6              | NA        | NA                               | Age, gender, tumor size, T stage, LNM, TD                    |
| Shi   | 2020 | CC         | qRT-PCR          | NA                 | 63          | 31/32                            | Up (4.26 ± 0.75, <i>P</i> <0.001)                                    | NA             | 9         | Data in paper                    | Age, tumor size, TS (FIGO), LNM, TD                          |
| Qiao  | 2019 | BC         | qRT-PCR          | NA                 | 80          | 40/40                            | Up (NA, <i>P</i> <0.0001)                                            | NA             | 9         | Survival curve                   | Age, tumor size, TS (TNM), LNM                               |
| Zhou  | 2020 | ESCC       | RNA FISH         | Score > 1          | 81          | 34/47                            | Up (NA, <i>P</i> <0.0001)                                            | NA             | 9         | Survival curve                   | Age, gender, tumor size, T stage, TS (TNM), TD,              |
| Gong  | 2020 | PC         | qRT-PCR          | NA                 | 57          | 28/29                            | Down (NA, <i>P</i> <0.001)                                           | NA             | 7         | Survival curve                   | NA                                                           |
| Xia   | 2018 | TC         | qRT-PCR          | Median value       | 60          | 30/30                            | Up (NA, <i>P</i> <0.05)                                              | 5              | NA        | NA                               | Age, gender, tumor size, TS (AJCC), LNM                      |
| Ba    | 2017 | GC         | qRT-PCR          | Median             | 79          | 46/33                            | Up (NA, <i>P</i> <0.05)                                              | NA             | 8         | Data in paper                    | Age, gender, tumor size, T stage, TS (TNM), LNM, DM, TD      |
| Huang | 2017 | GC         | qRT-PCR          | Fold-change ≥ 2    | 73          | 30/43                            | Up (NA, <i>P</i> <0.01)                                              | NA             | 8         | Data in paper                    | Age, gender, tumor size, TS (TNM), LNM, TD                   |
| Zheng | 2019 | EOC        | qRT-PCR          | Median value       | 131         | 66/65                            | Up (NA, <i>P</i> <0.0001)                                            | NA             | 8         | Survival curve and Data in paper | Age, tumor size, TS (FIGO), LNM, TD                          |
| Guan  | 2019 | LAD        | qRT-PCR          | ROC curve analysis | 119         | 76/43                            | Up (NA, <i>P</i> <0.001)                                             | NA             | 9         | Survival curve                   | Age, gender, T stage, TS, LNM, DM                            |
| Zhang | 2018 | PC         | qRT-PCR          | NA                 | 229         | NA                               | Up (NA, <i>P</i> <0.05)                                              | NA             | 8         | Lack of data                     | Age, TS, LNM, DM, TD                                         |
| Xia   | 2018 | BC         | qRT-PCR          | median value       | 35          | 22/13                            | Up (NA, <i>P</i> <0.05)                                              | 4              | NA        | NA                               | Age, tumor size, TS, LNM                                     |
| Zhang | 2017 | HCC        | qRT-PCR          | median             | 53          | 37/16                            | Up (NA, <i>P</i> <0.01)                                              | NA             | 8         | Survival curve                   | NA                                                           |
| Yu    | 2017 | TSCC       | ISH              | SQSC               | 202         | 110/92                           | Up (NA, <i>P</i> =0.020) <sup>3</sup>                                | NA             | 8         | Data in paper                    | Age, gender, T stage, TS (TNM), LNM, DM                      |
| Shi   | 2016 | NSCLC      | qRT-PCR          | ROC curve analysis | 80          | 41/39                            | Up (NA, <i>P</i> <0.05)                                              | 5              | NA        | NA                               | Age, gender, tumor size, TS (TNM), LNM, TD                   |

Abbreviations: BC, breast cancer; CC, cervical cancer; CRC, colorectal cancer; DM, distant metastasis; EOC, epithelial ovarian cancer; ESCC, oesophageal squamous cell carcinoma; GC, gastric cancer; HCC, hepatocellular carcinoma; LAD, lung adenocarcinoma; LNM, lymph node metastasis; NSCLC, non-small cell lung cancer; PC, pancreatic cancer; PDAC, pancreatic ductal adenocarcinoma; ROC, receiver operating characteristic curve; SQSC, semi-quantitative scoring criterion; TC, thyroid carcinoma; TD, tumor differentiation; TS, tumor stage; TSCC, tongue squamous cell carcinoma .

<sup>1</sup>The number of high- and low-expression of LINC00673.

<sup>2</sup>LINC00673 expression in tumors compared with control group.

<sup>3</sup>The sample size is 15.

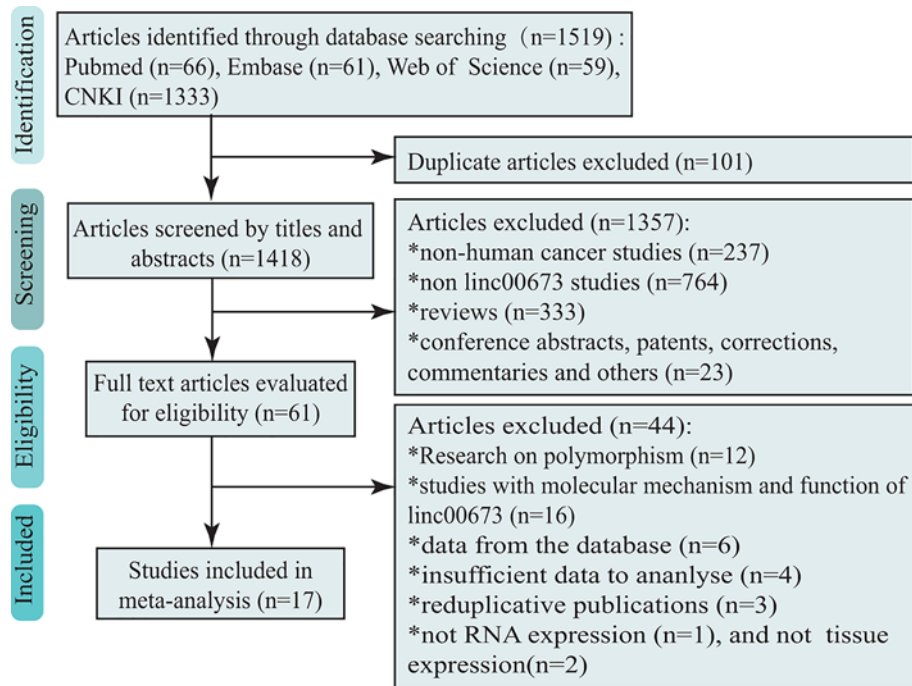

**Figure 1.** Flow chart of search strategy and study selection

linc00673 expression, linc00673 expression in patients with malignant tumor, patients' age and sex, tumor size, the T stage, tumor stage, lymph node metastasis and distant metastasis status, the tumor differentiation status and the OS rate. If we could not extract HRs and 95% CIs of the OS rate directly from the articles, Kaplan–Meier survival curves were collected for further computation using Engauge Digitizer software per the protocol described by Bennouna et al. and Tierney et al. [19,20].

## Statistical analyses

All statistical analyses were performed with Stata 12 software (Stata Corp, College Station, Texas, U.S.A.) by the investigator. Pooled HRs and ORs were used for the evaluation of OS rates and clinicopathologic parameters, respectively. Interstudy heterogeneity was investigated by the chi-square Q-test and  $I^2$  statistic.  $P$ -values of the Q test ( $P_Q$ )  $< 0.05$  and  $I^2 > 50\%$  were considered to indicate significant heterogeneity. When there was obvious heterogeneity, a random-effects model was applied for statistical analyses, otherwise, a fixed-effects model was implemented. In addition, publication bias was examined after using Begg's funnel plots and Egger's linear regression tests, and trim-and-fill analysis was used to assess the impact of potential publication bias [21]. Sensitivity analysis was conducted to determine whether any single study could influence the overall result.  $P < 0.05$  was considered statistically significant.

## Results

### Study selection

After a preliminary online search, 1519 studies in total were originally retrieved from the electronic databases; 101 articles were repeats, and 1357 articles were excluded after reading the titles and abstracts. A total of 61 articles were identified for full-text screening, of which 17 were included for data extraction. The literature screening process is shown in Figure 1.

### General characteristics of the study populations

Finally, 17 articles [10–14,16,22–32] comprising 1539 patients were selected for the meta-analysis. All of the included studies were performed in China and were published in English from 2016 to 2020. The median sample size was 76, with a wide range from 35 to 229. Tumor types included lung cancer (three articles) [16,23,32], pancreatic cancer (three articles) [10,11,30], gastric cancer (two articles) [27,31], breast cancer (two articles) [12,14], colorectal cancer

**Table 2 Association between linc00673 expression and the OS time**

| Survival analysis | N  | Patients (n) | HR    | 95% CI       | P      | Heterogeneity ( $I^2$ , $P_Q$ ) | Model  |
|-------------------|----|--------------|-------|--------------|--------|---------------------------------|--------|
| Univariate K-M    | 12 | 1059         | 1.720 | 1.12, 2.643  | 0.013  | 69.7%, <0.001                   | Random |
| Multivariate K-M  | 6  | 619          | 2.271 | 1.668, 3.093 | <0.001 | 5.7%, 0.380                     | Fixed  |

If  $I^2 > 50\%$ , the results were calculated by random model.  
 N, number of included studies.

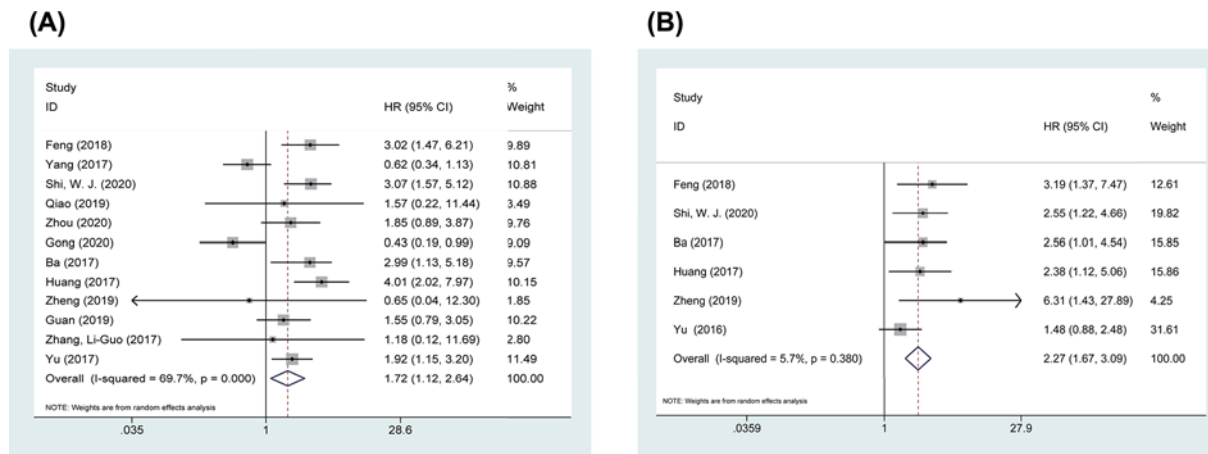

**Figure 2. Forest plots of OS**  
 (A) Univariate OS; (B) multivariate OS.

[22], cervical cancer [24], oesophageal squamous cell carcinoma [25], thyroid carcinoma [26], epithelial ovarian cancer [29], hepatocellular carcinoma [13], and tongue squamous cell carcinoma [31]. The basic characteristics of the included studies are presented in Table 1.

Data were extracted from 17 studies, of which 15 [10,12–14,16,22–30,32] contained information about the association between linc00673 and clinicopathologic parameters in a total of 1429 cancer patients. The clinicopathological parameters included age, sex, tumor size, T stage, tumor stage, lymph node metastasis, distant metastasis, and tumor differentiation (data shown in Supplementary Table S1). Meanwhile, 13 articles [10,11,13,14,16,22,24,25,27–31] contained information about the association between linc00673 expression and the OS rate, of which one study [30] lacked sufficient information to calculate the HR and 95% CI (data shown in Supplementary Table S2).

### Quality assessment

We utilized the NOS for cohort studies to assess the quality of the results presented in the articles. According to the criteria, all included studies were high-quality studies. Four studies involved only a cross-sectional measurement and were assessed using the AHRQ form. All of these studies were moderate-quality studies. The quality scores for the included studies are shown in Table 1.

### Meta-analyses of OS

The OS outcomes are shown in Table 2 and Figure 2. In the pooled analysis of 12 studies including 1059 patients, using a random-effects model because of data heterogeneity ( $I^2 = 69.7\%$ ,  $P_Q < 0.001$ ) among the studies, we were surprised to find that linc00673 overexpression was obviously correlated with poor OS rates in patients with malignant neoplasms with a combined HR of 1.720 (95% CI: 1.120, 2.643;  $P = 0.013$ ) (Figure 2A). Furthermore, a multivariate pooled analysis of six studies with 619 patients was conducted to explore the independent prognostic value of linc00673 expression in different malignancies. The pooled HRs revealed that the expression of linc00673 was an independent prognostic risk factor for OS (HR = 2.271, 95% CI: 1.668, 3.093,  $P < 0.001$ ) with no heterogeneity ( $I^2 = 5.7\%$ ,  $P_Q = 0.380$ ) (Figure 2B).

**Table 3 Association between linc00673 and clinicopathological parameters**

| Clinicopathological parameters                  | N  | Patients (n) | OR    | 95% CI       | P      | Heterogeneity (I <sup>2</sup> , P <sub>Q</sub> ) | Model  |
|-------------------------------------------------|----|--------------|-------|--------------|--------|--------------------------------------------------|--------|
| Age (elderly vs. nonelderly)                    | 15 | 1429         | 0.973 | 0.787, 1.203 | 0.800  | 0.0%, 0.725                                      | Fixed  |
| Gender (male vs. female)                        | 10 | 891          | 1.041 | 0.667, 1.625 | 0.861  | 51.3%, 0.030                                     | Random |
| Tumor size (larger vs. smaller)                 | 12 | 879          | 1.493 | 0.813, 2.741 | 0.196  | 73.4%, <0.001                                    | Random |
| T stage (later vs. earlier)                     | 6  | 607          | 1.749 | 1.171, 2.612 | 0.006  | 39.8%, 0.140                                     | Fixed  |
| Tumor stage (later vs. earlier)                 | 13 | 1303         | 2.047 | 1.621, 2.585 | <0.001 | 38.4%, 0.078                                     | Fixed  |
| Lymph node metastasis (positive vs. negative)   | 14 | 1348         | 2.288 | 1.830, 2.862 | <0.001 | 49.9%, 0.017                                     | Fixed  |
| Distant metastasis (presence vs. absence)       | 5  | 700          | 2.479 | 1.611, 3.813 | <0.001 | 0.0%, 0.739                                      | Fixed  |
| Tumor differentiation (poor vs. well, moderate) | 10 | 933          | 1.268 | 0.946, 1.699 | 0.112  | 47.4%, 0.047                                     | Fixed  |

If I<sup>2</sup> > 50%, the results were calculated by a random model.  
 N, number of included studies.

### Meta-analyses of clinicopathological parameters

The clinicopathological parameter outcomes are shown in Table 3 and Figure 3. Using the chi-square Q test and I<sup>2</sup> test, heterogeneity was observed between linc00673 overexpression and sex (I<sup>2</sup> = 51.3%, P<sub>Q</sub> = 0.030) and tumor size (I<sup>2</sup> = 73.4%, P<sub>Q</sub> < 0.001); thus, a random-effects model was applied. The increased expression level of linc00673 was significantly associated with T stage (pooled odds ratio (OR) = 1.749, 95% CI: 1.171, 2.612, P=0.006) (Figure 3A), tumor stage (pooled OR = 2.047, 95% CI: 1.621, 2.585, P<0.001) (Figure 3B), lymph node metastasis (pooled OR = 2.288, 95% CI: 1.830, 2.862, P<0.001) (Figure 3C), and distant metastasis (pooled OR = 2.479, 95% CI: 1.611, 3.813, P<0.001) (Figure 3D). There was no significant association between linc00673 overexpression and patient age (P=0.800) (Supplementary Figure S1A), sex (P=0.861) (Supplementary Figure S1B), tumor size (P=0.196) (Supplementary Figure S1C), or tumor differentiation (P=0.112) (Supplementary Figure S1D).

### Publication bias and sensitivity analysis

Begg's funnel plot and Egger's regression test were used to determine publication bias. Begg's test (P=0.244) and Egger's test (P=0.667) illustrated the absence of publication bias for OS in the univariate analysis (Supplementary Table S3, Figure 4E). For OS in the multivariate analysis, the visual measurement of the funnel plot exhibited slight asymmetry (Figure 4A), and Egger's test (P=0.006) revealed probable evidence of publication bias (Supplementary Table S3). Furthermore, to explore the impact of potential publication bias, we performed a trim-and-fill analysis with a fixed-effects model. The study was filled with two other studies by three iterations (Figure 4B). Likewise, linc00673 expression was an independent prognostic factor for worse OS rates in patients with malignancy (HR (filled) = 2.033, 95% CI: 1.543, 2.678, P<0.001). These results suggested that the effect of publication bias was not significant, and that the conclusion was relatively stable.

No significant publication bias was observed in the clinicopathological parameters (Supplementary Table S3 and Figure S2A–G), except for tumor stage (P=0.019) (Supplementary Table S3, Figure 4C). To resolve this issue, the same trim-and-fill method was used. After analysis, the study was filled with five other studies by five iterations (Figure 4D). The pooled analysis included hypothetical studies and continued to indicate a statistically significant association between tumor stage and the expression level of linc00673 (filled OR = 1.754, 95% CI 1.266, 2.431, P=0.001). The result was the same as previously obtained, which indicated that the effect of publication bias was not significant and that the conclusion was stable.

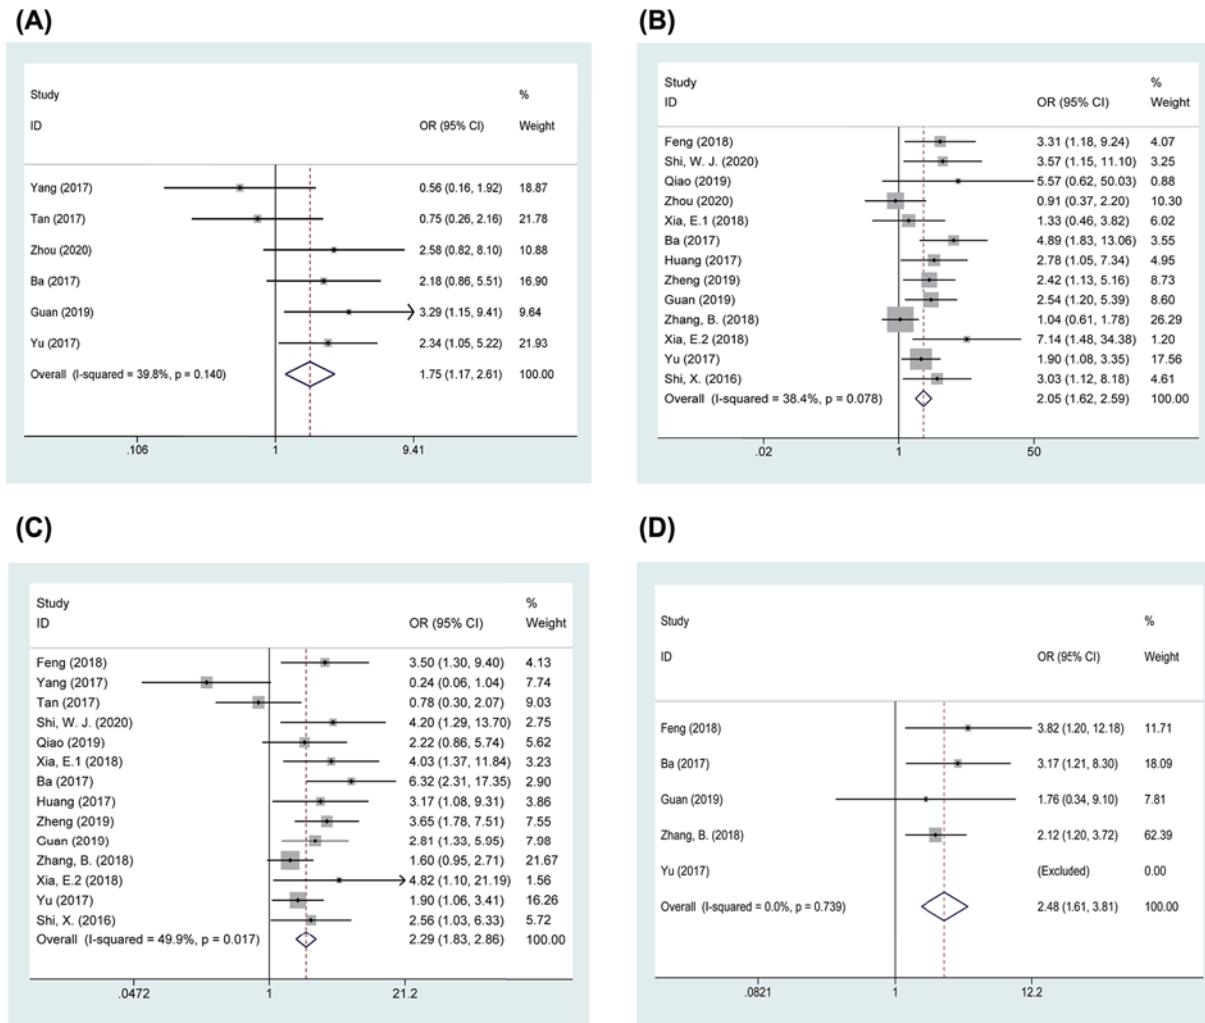

**Figure 3. Forest plots of clinicopathological parameters**  
 (A) T stage; (B) tumor stage; (C) lymph node metastasis; (D) distant metastasis.

A sensitivity analysis was performed in which one study was omitted at a time to explore the effect of the excluded dataset on each clinicopathological parameter and the OS rate. The relationship continued to be significant when any single study was removed, verifying the stability of the conclusion (Figure 4F, Supplementary Figure S3A–I).

## Discussion

In pancreatic cancer, the earliest report on linc00673, newly discovered gene locus, revealed that this lincRNA is significantly associated with the risk for cancer as determined by a genome-wide association study (GWAS) [33]. On one hand, it was demonstrated that linc00673 expression was significantly down-regulated in pancreatic cancer tissues and cell lines and that it acts as a novel tumor suppressor that can inhibit cancer cell cycle progression, proliferation and tumorigenesis; silencing linc00673 can promote cell proliferation [10,11,34]. On the other hand, as more in-depth research has been conducted, it has been found that linc00673 is enriched in a wide variety of tumors and plays an important role in tumorigenesis and tumor biological behavior, including cell proliferation, migration, invasion, and tumor metastasis [35]. First, linc00673 regulates the invasion and metastasis capabilities of breast cancer cells by regulating B7-H6 expression [12]. Second, it can also act as a scaffold for Wnt/ $\beta$ -catenin signalling which, when overactivated, promotes lung adenocarcinoma cell migration, invasion, and metastasis [16]. Third, linc00673 is known to form a complex with androgen receptor (AR), and Brn3a activates matrix metalloproteinase 9 (MMP9), which has been shown to increase melanoma invasiveness [36]. Moreover, linc00673 and AR might act together to regulate p21 (a primary inhibitor of cyclin-dependent kinases) and subsequently enhance melanoma cell proliferation

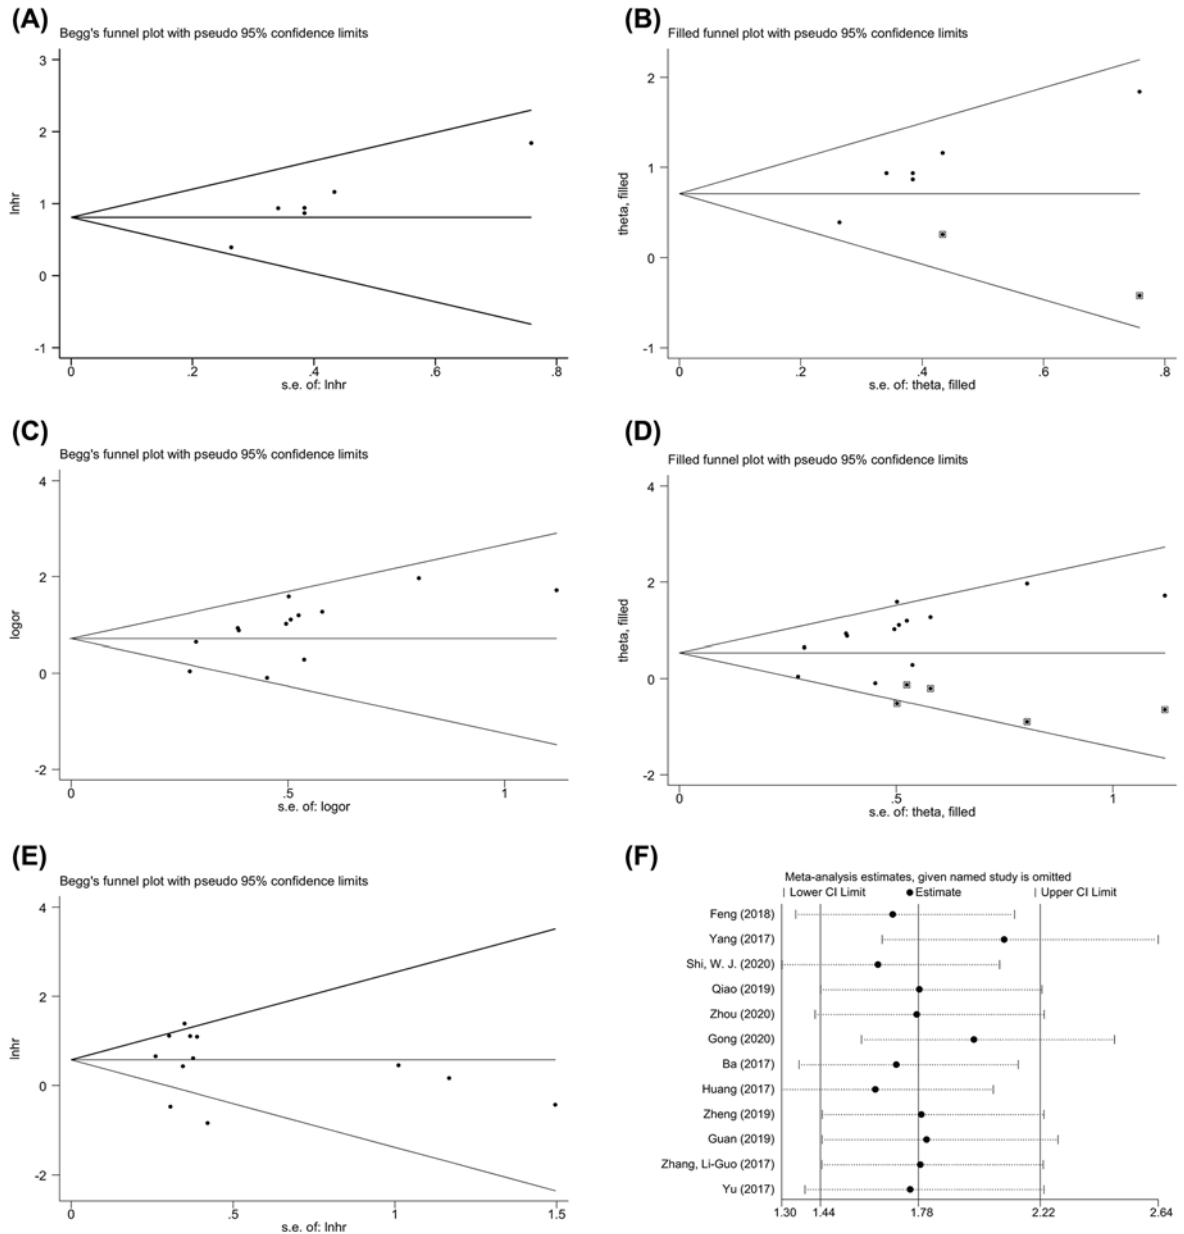

**Figure 4. Publication bias and sensitivity analysis in this meta-analysis**

(A,B) Publication bias for multivariate OS. (C,D) Publication bias for tumor stage. (E) Publication bias for univariate OS. (F) Sensitivity analysis for univariate OS.

and tumor growth [37]. Furthermore, linc00673 plays a competing endogenous RNAs (ceRNA) role in regulating gene expression by competitively binding to miRNAs, such as miR-150-5p [35] and miR-515-5p [14], eventually leading to proliferation, migration, invasion, and Epithelial-Mesenchymal Transition (EMT).

In clinical tests, a growing body of data has revealed the relationship between linc00673, clinicopathological parameters and the prognosis of various malignancies. It has been observed that linc00673 overexpression is correlated with poor prognosis of patients with several types of tumor in many studies [16,25,28]. However, the results of other studies have indicated that higher linc00673 expression may indicate a better prognosis [10,11]. Some articles have shown that the levels of linc00673 do not correlate with any of the clinicopathological parameters [23]. Yang et al. investigated linc00673 expression down-regulation in pancreatic ductal adenocarcinoma (PDAC), and the results showed that high linc00673 expression was associated with smaller tumor size, a lower frequency of lymph node



involvement, and good tumor differentiation [10]. However, many other studies have revealed that linc00673 overexpression correlates positively with the aggressive clinicopathological features of malignant tumors [14,28,31,32]. Overall, the relationship between linc00673 expression and clinicopathological features, as well as its influence on prognostic outcome, remain under dispute. To provide clarity, we are the first to combine all published studies in a meta-analysis to evaluate the clinical and prognostic values of linc00673 among different types of malignancies. Above all, the results of the present study showed that patients with high linc00673 expression had a worse OS rates in both the univariate and multivariate survival analyses, suggesting that linc00673 was an independent prognostic factor in patients with malignancy. These results were similar to the previous meta-analysis by Gao et al [38]. They also reported that linc00673 demonstrated significantly prognostic value. Similarly, Zhu et al. in his literature review article explored that the high expression of linc00673, which acts as a pro-oncogene, is related to adverse outcomes for patients [39]. Moreover, our results showed that in patients with malignancy, the increased expression of linc00673 was associated with later T stage and tumor stage and an increased likelihood of lymph node metastasis and distant metastasis. These results suggest a role for linc00673 in the invasiveness and metastasis of malignancies.

This meta-analysis had several limitations. First, the number of samples examined in the present study was relatively small, which might account for the heterogeneity across studies and publication bias related to tumor stage. Second, different detection methods of linc00673 were used in the included studies, and even when the same qRT-PCR assay methods were used, the heterogeneity among studies could be attributable to the use of different PCR primer sets. Third, no consensus on cut-off values for high and low linc00673 expression among the studies was reached, and not all articles reported these data. Fourth, several original studies did not provide complete data to allow for inclusion in the analysis. Finally, potential heterogeneity may also be caused by other confounding factors, such as different tumor types and different study designs.

## Conclusion

In summary, this meta-analysis revealed that overexpression of linc00673 was significantly correlated with a shorter OS time in patients with malignant tumors and might serve as a novel effective prognostic biomarker and potential therapeutic target for malignancy. Moreover, the increased expression level of linc00673 was significantly correlated with T stage, tumor stage, lymph node metastasis, and distant metastasis, which indicated that linc00673 is involved in the progression and invasion capabilities of malignancies. However, larger scale and deeper investigations and higher quality clinical studies across ethnicities are necessary to explore the prognostic value and tumorigenic role of linc00673 before its expression level can be used clinically.

## Data Availability

All data generated or analyzed during the present study are included in this published article and its supplementary information files.

## Competing Interests

The authors declare that there are no competing interests associated with the manuscript.

## Funding

The authors declare that there are no sources of funding to be acknowledged.

## CRedit Author Contribution

**Yurong Zhu:** Data curation, Software, Formal analysis, Investigation, Methodology, Writing—original draft. **Zhifa Zhang:** Data curation, Formal analysis, Investigation, Methodology, Writing—original draft. **Hui Peng:** Data curation, Software, Formal analysis, Writing—review and editing. **Weiping Li:** Formal analysis, Supervision, Validation, Methodology. **Shaowei Hu:** Validation, Visualization, Methodology. **Min Zhao:** Supervision, Validation, Writing—review and editing. **Weifeng Lin:** Conceptualization, Supervision, Methodology, Project administration, Writing—review and editing.

## Abbreviations

AHRQ, Agency for Healthcare Research and Quality; AR, androgen receptor; ceRNA, competing endogenous RNAs; CI, confidence interval; EMT, Epithelial-Mesenchymal Transition; HR, hazard ratio; lincRNA, long intergenic non-coding RNA; linc00673, long intergenic non-protein coding RNA 673; lncRNA, long non-coding RNA; ncRNA, non-coding RNA; NOS, Newcastle-Ottawa Quality Assessment Scale; OR, odds ratio; OS, overall survival; SLNCR, SRA-like non-coding RNA.

## References

- 1 Sung, H., Ferlay, J., Siegel, R.L., Laversanne, M., Soerjomataram, I., Jemal, A. et al. (2021) Global cancer statistics 2020: GLOBOCAN estimates of incidence and mortality worldwide for 36 cancers in 185 countries. *CA Cancer J. Clin* **71**, 209–249, <https://doi.org/10.3322/caac.21660>
- 2 You, J.S. and Jones, P.A. (2012) Cancer genetics and epigenetics: two sides of the same coin? *Cancer Cell* **22**, 9–20, <https://doi.org/10.1016/j.ccr.2012.06.008>
- 3 Djebali, S., Davis, C.A., Merkel, A., Dobin, A., Lassmann, T., Mortazavi, A. et al. (2012) Landscape of transcription in human cells. *Nature* **489**, 101–108, <https://doi.org/10.1038/nature11233>
- 4 Anastasiadou, E., Jacob, L.S. and Slack, F.J. (2018) Non-coding RNA networks in cancer. *Nat. Rev. Cancer* **18**, 5–18, <https://doi.org/10.1038/nrc.2017.99>
- 5 Bhan, A., Soleimani, M. and Mandal, S.S. (2017) Long noncoding RNA and cancer: a new paradigm. *Cancer Res.* **77**, 3965–3981, <https://doi.org/10.1158/0008-5472.CAN-16-2634>
- 6 Kaikkonen, M.U. and Adelman, K. (2018) Emerging roles of non-coding RNA transcription. *Trends Biochem. Sci* **43**, 654–667, <https://doi.org/10.1016/j.tibs.2018.06.002>
- 7 Schmitt, A.M. and Chang, H.Y. (2016) Long noncoding RNAs in cancer pathways. *Cancer Cell* **29**, 452–463, <https://doi.org/10.1016/j.ccell.2016.03.010>
- 8 Deniz, E. and Erman, B. (2017) Long noncoding RNA (lincRNA), a new paradigm in gene expression control. *Funct. Integr. Genomics* **17**, 135–143, <https://doi.org/10.1007/s10142-016-0524-x>
- 9 Nguyen, T.C., Zaleta-Rivera, K., Huang, X., Dai, X. and Zhong, S. (2018) RNA, action through interactions. *Trends Genet.* **34**, 867–882, <https://doi.org/10.1016/j.tig.2018.08.001>
- 10 Yang, A., Lai, X., Wang, Y., Dai, H., You, Y., Liu, W. et al. (2017) Downregulation of LINC00673 promotes tumor proliferation via repression of HNF1A in human pancreatic ductal adenocarcinoma. *Int. J. Clin. Exp. Med.* **10**, 4538–4546
- 11 Gong, Y., Dai, H.S., Shu, J.J., Liu, W., Bie, P. and Zhang, L.D. (2020) LINC00673 suppresses proliferation and metastasis of pancreatic cancer via target miR-504/HNF1A. *J. Cancer* **11**, 940–948, <https://doi.org/10.7150/jca.32855>
- 12 Xia, E., Shen, Y., Bhandari, A., Zhou, X., Wang, Y., Yang, F. et al. (2018) Long non-coding RNA LINC00673 promotes breast cancer proliferation and metastasis through regulating B7-H6 and epithelial-mesenchymal transition. *Am. J. Cancer Res.* **8**, 1273–1287
- 13 Zhang, L.-G., Zhou, X.-K., Zhou, R.-J., Lv, H.-Z. and Li, W.-P. (2017) Long non-coding RNA LINC00673 promotes hepatocellular carcinoma progression and metastasis through negatively regulating miR-205. *Am. J. Cancer Res.* **7**, 2536–2544
- 14 Qiao, K., Ning, S., Wan, L., Wu, H., Wang, Q., Zhang, X. et al. (2019) LINC00673 is activated by YY1 and promotes the proliferation of breast cancer cells via the miR-515-5p/MARK4/Hippo signaling pathway. *J. Exp. Clin. Cancer Res.* **38**, 418, <https://doi.org/10.1186/s13046-019-1421-7>
- 15 Xu, W., Xu, Q., Kuang, D., Wang, Z., Lu, Q., Lin, Q. et al. (2019) Long non-coding RNA SLNCR1 regulates non-small cell lung cancer migration, invasion and stemness through interactions with secretory phospholipase A2. *Mol. Med. Rep.* **20**, 2591–2596, <https://doi.org/10.3892/mmr.2019.10518>
- 16 Guan, H., Zhu, T., Wu, S., Liu, S., Liu, B., Wu, J. et al. (2019) Long noncoding RNA LINC00673-v4 promotes aggressiveness of lung adenocarcinoma via activating WNT/ $\beta$ -catenin signaling. *Proc. Natl. Acad. Sci. U.S.A.* **116**, 14019–14028, <https://doi.org/10.1073/pnas.1900997116>
- 17 Rostom, A., Dubé, C., Cranney, A., Saloojee, N., Sy, R. and Garrity, C. (2004) Celiac disease. *Evidence Report/Technology Assessment No. 104. (Prepared by the University of Ottawa Evidence-based Practice Center, under Contract No. 290-02-0021.) AHRQ Publication No. 04-E029-2*, Agency for Healthcare Research and Quality, Rockville, MD
- 18 Zhong, H., Qian, Y., Fang, S., Wang, Y., Tang, Y. and Gu, W. (2018) Prognostic value of plasma fibrinogen in lung cancer patients: a meta-analysis. *J. Cancer* **9**, 3904–3911, <https://doi.org/10.7150/jca.26360>
- 19 Tierney, J.F., Stewart, L.A., Ghersi, D., Burdett, S. and Sydes, M.R. (2007) Practical methods for incorporating summary time-to-event data into meta-analysis. *Trials* **8**, 16, <https://doi.org/10.1186/1745-6215-8-16>
- 20 Bennouna, J., Sastre, J., Arnold, D., Österlund, P., Greil, R., Van Cutsem, E. et al. (2013) Continuation of bevacizumab after first progression in metastatic colorectal cancer (ML18147): a randomised phase 3 trial. *Lancet Oncol.* **14**, 29–37, [https://doi.org/10.1016/S1470-2045\(12\)70477-1](https://doi.org/10.1016/S1470-2045(12)70477-1)
- 21 Zhou, Y., Wang, R., Xu, T., Xie, P., Zhang, Y., Zhang, A. et al. (2019) Prognostic value of long noncoding RNA CRNDE as a novel biomarker in solid cancers: an updated systematic review and meta-analysis. *J. Cancer* **10**, 2386–2396, <https://doi.org/10.7150/jca.31088>
- 22 Feng, L.M., Zhao, D.W., Li, S.J. and Huang, J. (2018) Association of the upregulation of LncRNA00673 with poor prognosis for colorectal cancer. *Eur. Rev. Med. Pharmacol. Sci.* **22**, 687–694
- 23 Tan, Q., Yu, Y., Li, N., Jing, W., Zhou, H., Qiu, S. et al. (2017) Identification of long non-coding RNA 00312 and 00673 in human NSCLC tissues. *Mol. Med. Rep.* **16**, 4721–4729, <https://doi.org/10.3892/mmr.2017.7196>
- 24 Shi, W.J., Liu, H., Ge, Y.F., Wu, D., Tan, Y.J., Shen, Y.C. et al. (2020) LINC00673 exerts oncogenic function in cervical cancer by negatively regulating miR-126-5p expression and activates PTEN/PI3K/AKT signaling pathway. *Cytokine* **136**, 155286, <https://doi.org/10.1016/j.cyto.2020.155286>
- 25 Zhou, M., Mao, Y., Yu, S., Li, Y., Yin, R., Zhang, Q. et al. (2020) LINC00673 represses CDKN2C and promotes the proliferation of esophageal squamous cell carcinoma cells by EZH2-mediated H3K27 trimethylation. *Front. Oncol.* **10**, 1546, <https://doi.org/10.3389/fonc.2020.01546>
- 26 Xia, E., Bhandari, A., Shen, Y., Zhou, X. and Wang, O. (2018) LncRNA LINC00673 induces proliferation, metastasis and epithelial-mesenchymal transition in thyroid carcinoma via Kruppel-like factor 2. *Int. J. Oncol.* **53**, 1927–1938, <https://doi.org/10.3892/ijo.2018.4524>
- 27 Ba, M.-C., Long, H., Cui, S.-Z., Gong, Y.-F., Yan, Z.-F., Wu, Y.-B. et al. (2017) Long noncoding RNA LINC00673 epigenetically suppresses KLF4 by interacting with EZH2 and DNMT1 in gastric cancer. *Oncotarget* **8**, 95542–95553, <https://doi.org/10.18632/oncotarget.20980>
- 28 Huang, M., Hou, J., Wang, Y., Xie, M., Wei, C., Nie, F. et al. (2017) Long noncoding RNA LINC00673 is activated by SP1 and exerts oncogenic properties by interacting with LSD1 and EZH2 in gastric cancer. *Mol. Ther.* **25**, 1014–1026, <https://doi.org/10.1016/j.ymthe.2017.01.017>

- 29 Zheng, T., Qiu, J., Li, C., Lin, X., Tang, X. and Hua, K. (2019) Long noncoding RNA LINC00673 promotes the proliferation and metastasis of epithelial ovarian cancer by associating with opioid growth factor receptor. *Onco Targets Ther.* **12**, 6145–6156, <https://doi.org/10.2147/OTT.S209784>
- 30 Zhang, B., Li, C. and Sun, Z. (2018) Long non-coding RNA LINC00346, LINC00578, LINC00673, LINC00671, LINC00261, and SNHG9 are novel prognostic markers for pancreatic cancer. *Am. J. Transl. Res.* **10**, 2648–2658
- 31 Yu, J., Liu, Y., Gong, Z., Zhang, S., Guo, C., Li, X. et al. (2017) Overexpression long non-coding RNA LINC00673 is associated with poor prognosis and promotes invasion and metastasis in tongue squamous cell carcinoma. *Oncotarget* **8**, 16621–16632, <https://doi.org/10.18632/oncotarget.14200>
- 32 Shi, X., Ma, C., Zhu, Q., Yuan, D., Sun, M., Gu, X. et al. (2016) Upregulation of long intergenic noncoding RNA 00673 promotes tumor proliferation via LSD1 interaction and repression of NCALD in non-small-cell lung cancer. *Oncotarget* **7**, 25558–25575, <https://doi.org/10.18632/oncotarget.8338>
- 33 Childs, E.J., Mocci, E., Campa, D., Bracci, P.M., Gallinger, S., Goggins, M. et al. (2015) Common variation at 2p13.3, 3q29, 7p13 and 17q25.1 associated with susceptibility to pancreatic cancer. *Nat. Genet.* **47**, 911–+, <https://doi.org/10.1038/ng.3341>
- 34 Zheng, J., Huang, X., Tan, W., Yu, D., Du, Z., Chang, J. et al. (2016) Pancreatic cancer risk variant in LINC00673 creates a miR-1231 binding site and interferes with PTPN11 degradation. *Nat. Genet.* **48**, 747–+, <https://doi.org/10.1038/ng.3568>
- 35 Lu, W., Zhang, H., Niu, Y., Wu, Y., Sun, W., Li, H. et al. (2017) Long non-coding RNA linc00673 regulated non-small cell lung cancer proliferation, migration, invasion and epithelial mesenchymal transition by sponging miR-150-5p. *Mol. Cancer* **16**, 118, <https://doi.org/10.1186/s12943-017-0685-9>
- 36 Schmidt, K., Joyce, C.E., Buquicchio, F., Brown, A., Ritz, J., Distel, R.J. et al. (2016) The lncRNA SLNCR1 mediates melanoma invasion through a conserved SRA1-like region. *Cell Rep.* **15**, 2025–2037, <https://doi.org/10.1016/j.celrep.2016.04.018>
- 37 Schmidt, K., Carroll, J.S., Yee, E., Thomas, D.D., Wert-Lamas, L., Neier, S.C. et al. (2019) The lncRNA SLNCR recruits the androgen receptor to EGR1-bound genes in melanoma and inhibits expression of tumor suppressor p21. *Cell Rep.* **27**, 2493, <https://doi.org/10.1016/j.celrep.2019.04.101>
- 38 Gao, S., Zhao, Z.Y., Wu, R., Zhang, Y. and Zhang, Z.Y. (2018) Prognostic value of long noncoding RNAs in gastric cancer: a meta-analysis. *Onco Targets Ther.* **11**, 4877–4891, <https://doi.org/10.2147/OTT.S169823>
- 39 Zhu, K.J., Gong, Z.J., Li, P.C., Jiang, X.J., Zeng, Z.Y., Xiong, W. et al. (2021) A review of linc00673 as a novel lncRNA for tumor regulation. *Int. J. Med. Sci.* **18**, 398–405, <https://doi.org/10.7150/ijms.48134>
